# Supplementary material for: Translocation of tetrahedral DNA nanostructures through a solid-state nanopore
Source: Royal Society of Chemistry journal article supplement (doi:10.1039/c8nr10474c), 2019-01-01
Supplement: c8nr10474c1.pdf [file c8nr10474c1.pdf]

**Supporting information for**  
**Translocation of Tetrahedral DNA Nanostructures through a Solid-**  
**State Nanopore**

Xinjia Zhao<sup>1,4</sup>, Ruiping Ma<sup>3</sup>, Ying Hu<sup>1</sup>, Xiaoyu Chen<sup>1,4</sup>, Ruifen Dou<sup>3</sup>, Ke Liu<sup>7</sup>,  
Chengjun Cui<sup>2</sup>, Huajie Liu<sup>2</sup>, Qian Li<sup>7</sup>, Dun Pan<sup>2,8</sup>, Xinyan Shan<sup>1</sup>, Lihua Wang<sup>2,9</sup>,  
Chunhai Fan<sup>2,7</sup>, Xinghua Lu<sup>1,4,5,6</sup>

<sup>1</sup>*Beijing National Laboratory for Condensed-Matter Physics and Institute of Physics, Chinese Academy of Sciences, Beijing 100190, China*

<sup>2</sup>*Division of Physical Biology and Bioimaging Center, Shanghai Synchrotron Radiation Facility, CAS Key Laboratory of Interfacial Physics and Technology, Shanghai Institute of Applied Physics, Chinese Academy of Sciences, Shanghai 201800, China*

<sup>3</sup>*Beijing Normal University, 100000 Beijing, China*

<sup>4</sup>*School of Physical Sciences, University of Chinese Academy of Sciences, Beijing 100190, China*

<sup>5</sup>*Center for Excellence in Topological Quantum Computation, Chinese Academy of Sciences, Beijing 100190, China*

<sup>6</sup>*Songshan Lake Materials Laboratory, Dongguan, Guangdong 523808, China*

<sup>7</sup>*School of Chemistry and Chemical Engineering, and Institute of Molecular Medicine, Renji Hospital, School of Medicine, Shanghai Jiao Tong University, Shanghai 200240, China*

<sup>8</sup>*Key Laboratory for the Genetics of Developmental and Neuropsychiatric Disorders (Ministry of Education), Bio-X Institutes, Shanghai Jiao Tong University, Shanghai 200030, China*

<sup>9</sup>*Shanghai Key Laboratory of Green Chemistry and Chemical Processes, School of Chemistry and Molecular Engineering, East China Normal University, 500 Dongchuan Road, Shanghai, 200241, China*

### (1) Tetrahedral DNA nanostructures and M13 DNA sequences

The 7-bp TDNs are self-assembled by four DNA strands A7, B7, C7, and D7, each of them contains 23 bases. The 10-bp, 13-bp, and 20-bp TDNs are self-assembled by DNA strands with similar names as listed below. The 7-bp marker TDNs are self-assembled by four DNA strands A7, B7, C7, and D'7. The 13-bp marker TDNs are self-assembled by A13, B13, C13, D'13. The linear DNA molecule used in our experiment is M13mp18. The sequence of one of its strands is listed below. The marker TDN is bonded to this strand. The same color indicates the pairing sequences.

| strand | sequence                                                                      |
|--------|-------------------------------------------------------------------------------|
| A7     | CTCCACAAGTTCACCACTCGCAA                                                       |
| B7     | TGTGGAGACGGTGTGAGCGGATT                                                       |
| C7     | GTGTCAGAGGTGAACAAATCCGC                                                       |
| D7     | CTGACACACACACCGATTGCGAG                                                       |
| D'7    | CTGACACACACACCGATTGCGAGCGGATGAGTTATAGTATTGC                                   |
| A10    | TAGCTCGCTAAATTACCGCTTACGCCATAGTA                                              |
| B10    | CAACTCCAGGAAAGCGGTAATAGGTCCAATCT                                              |
| C10    | CCTGGAGTTGTTACGTGGGAAATACTATGGCG                                              |
| D10    | TAGCGAGCTAATCCCACGTATAGATTGGACC                                               |
| A13    | TACGCTCCAGGAATGATGTGACACGTATGTGATGCAGTCT                                      |
| B13    | TCCTGGGAGCGTAAGTCGAACGTAGTG TAGTTGAGCGAGCA                                    |
| C13    | CCAGTGGTCTCATAACGTGTCACATCAATGCTCGCTCAACT                                     |
| D13    | ATGAGACCACTGGTCACTACGTTCGACAAGACTGCATCACA                                     |
| D'13   | ATGAGACCACTGGTCACTACGTTCGACAAGACTGCATCACA <b>AAACTGGTTC<br/>GTGTCCGTTCTAC</b> |
| A20    | CAGTTGAGACGAACATTCCTAAGTCTGAAATTTATCACCCGCCATAGTAGA                           |

|     |                                                                                                                                                                                                                                                                                                                                                                                                                                                                                                                                                                                                                                                                                                                                                                                                                                                                                                                                                                                                                                                                                                                                                                                                                                                                                                                                                                                                                                                                            |
|-----|----------------------------------------------------------------------------------------------------------------------------------------------------------------------------------------------------------------------------------------------------------------------------------------------------------------------------------------------------------------------------------------------------------------------------------------------------------------------------------------------------------------------------------------------------------------------------------------------------------------------------------------------------------------------------------------------------------------------------------------------------------------------------------------------------------------------------------------------------------------------------------------------------------------------------------------------------------------------------------------------------------------------------------------------------------------------------------------------------------------------------------------------------------------------------------------------------------------------------------------------------------------------------------------------------------------------------------------------------------------------------------------------------------------------------------------------------------------------------|
|     | CGTATCACCAGG                                                                                                                                                                                                                                                                                                                                                                                                                                                                                                                                                                                                                                                                                                                                                                                                                                                                                                                                                                                                                                                                                                                                                                                                                                                                                                                                                                                                                                                               |
| B20 | GCTACACGATTCAGACTTAGGAATGTTTCGACATGCGAGGGTCCAATACCGA<br>CGATTACAGCTT                                                                                                                                                                                                                                                                                                                                                                                                                                                                                                                                                                                                                                                                                                                                                                                                                                                                                                                                                                                                                                                                                                                                                                                                                                                                                                                                                                                                       |
| C20 | GTGATAAAACGTGTAGCAAGCTGTAATCGACGGGAAGAGCATGCCCATCC<br>ACTACTATGGCGG                                                                                                                                                                                                                                                                                                                                                                                                                                                                                                                                                                                                                                                                                                                                                                                                                                                                                                                                                                                                                                                                                                                                                                                                                                                                                                                                                                                                        |
| D20 | CTCGCATGACTCAACTGCCTGGTGATACGAGGATGGGCATGCTCTTCCCGA<br>CGGTATTGGACC                                                                                                                                                                                                                                                                                                                                                                                                                                                                                                                                                                                                                                                                                                                                                                                                                                                                                                                                                                                                                                                                                                                                                                                                                                                                                                                                                                                                        |
| M13 | TCTAGAGTCGACCTGCAGGCATGCAAGCTTGGCACTGGCCGTCGT<br>TTTACAACGTCGTGACTGGGAAAACCCTGGCGTTACCCAACCTAA<br>TCGCCTTGCAGCACATCCCCCTTTCGCCAGCTGGCGTAATAGCGA<br>AGAGGCCCGCACCGATCGCCCTTCCAACAGTTGCGCAGCCTGA<br>ATGGCGAATGGCGCTTTGCCTGGTTTCCGGCACCAGAAGCGGTGC<br>CGGAAAGCTGGCTGGAGTGCGATCTTCTGAGGCCGATACGGTC<br>GTCGTCCCCTCAAACCTGGCAGATGCACGGTTACGATGCGCCCATC<br>TACACCAACGTAACCTATCCCATTACGGTCAATCCGCCGTTTGTT<br>CCCACGGAGAATCCGACGGGTTGTTACTCGCTCACATTTAATGTT<br>GATGAAAGCTGGCTACAGGAAGGCCAGACGCGAATTATTTTTGA<br>TGGCGTTCCTATTGGTTAAAAAATGAGCTGATTTAACAAAAATTT<br>AACGCGAATTTTAAACAAAATATTAACGTTTACAATTTAAATATTT<br>GCTTATACAATCTTCCTGTTTTTGGGGCTTTTCTGATTATCAACCG<br>GGGTACATATGATTGACATGCTAGTTTTACGATTACCGTTCATCG<br>ATTCTCTTGTTGCTCCAGACTCTCAGGCAATGACCTGATAGCCTT<br>TGTAGATCTCTCAAAAATAGCTACCCTCTCCGGCATTAAATTTATC<br>AGCTAGAACGGTTGAATATCATATTGATGGTGATTTGACTGTCTC<br>CGGCCTTCTCACCCCTTTTGAATCTTTACCTACACATTACTCAGGC<br>ATTGCATTTAAAATATATGAGGGTTCTAAAAATTTTTATCCTTGC<br>GTTGAAATAAAGGCTTCTCCCGCAAAGTATTACAGGGTCATAAT<br>GTTTTTGGTACAACCGATTTAGCTTTATGCTCTGAGGCTTTATTGC<br>TTAATTTTGCTAATTCTTTGCCTTGCCTGTATGATTTATTGGATGT<br>TAATGCTACTACTATTAGTAGAATTGATGCCACCTTTTCAGCTCG<br>CGCCCCAAATGAAAATATAGCTAAACAGGTTATTGACCATTTGCG<br>AAATGTATCTAATGGTCAAACCTAAATCTACTCGTTCGCAGAATTG<br>GGAATCAACTGTTACATGGAATGAACTTCCAGACACCGTACTTT<br>AGTTGCATATTTAAAACATGTTGAGCTACAGCACCAGATTACAGCA<br>ATTAAGCTCTAAGCCATCCGCAAAGTATTGACCTCTTATCAAAGG<br>AGCAATTAAGGTACTCTCTAATCCTGACCTGTTGGAGTTTGCTT |

CCGGTCTGGTTCGCTTTGAAGCTCGAATTAACGCGATATTTGA  
AGTCTTTCGGGCTTCCCTCTTAATCTTTTTGATGCAATCCGCTTTGC  
TTCTGACTATAATAGTCAGGGTAAAGACCTGATTTTTGATTTATG  
GTCATTCTCGTTTTCTGAACTGTTTAAAGCATTGAGGGGGATT  
AATGAATATTTATGACGATTCCGCAGTATTGGACGCTATCCAGTC  
TAAACATTTACTATTACCCCTCTGGCAAACTTCTTTTGCAA  
AGCCTCTCGCTATTTTGGTTTTATCGTCGTCTGGTAAACGAGGGT  
TATGATAGTGTTGCTCTTACTATGCCTCGTAATTCCTTTTGGCGTT  
ATGTATCTGCATTAGTTGAATGTGGTATTCCCTAAATCTCAACTGA  
TGAATCTTTCTACCTGTAATAATGTTGTTCCGTTAGTTCGTTTTAT  
TAACGTAGATTTTTCTTCCCAACGTCCTGACTGGTATAATGAGCC  
AGTTCTTAAAATCGCATAAGGTAATTCACAATGATTAAGTTGAA  
ATTAAACCATCTCAAGCCCAATTTACTACTCGTTCCTGGTGTCTCG  
TCAGGGCAAGCCTTATTCACTGAATGAGCAGCTTTGTTACGTTGA  
TTTGGGTAATGAATATCCGGTCTTGTCAAGATTACTCTTGATGA  
AGGTCAGCCAGCCTATGCGCCTGGTCTGTACACCGTTCATCTGTC  
CTCTTTCAAAGTTGGTCAGTTCGGTCCCTTATGATTGACCGTCTG  
CGCCTCGTTCGGCTAAGTAACATGGAGCAGGTCGCGGATTTCGA  
CACAATTTATCAGGCGATGATACAAATCTCCGTTGTACTTTGTTT  
CGCGCTTGGTATAATCGCTGGGGGTCAAAGATGAGTGTTTTAGTG  
TATTCTTTCGCCTCTTTCGTTTTAGGTTGGTGCCTTCGTAGTGGCA  
TTACGTATTTTACCCGTTTAAATGGAACTTCCTCATGAAAAAGTC  
TTAGTCCCTCAAAGCCTCTGTAGCCGTTGCTACCCTCGTTCGGATG  
CTGTCTTTCGCTGCTGAGGGTGACGATCCCGCAAAGCGGCCTTT  
AACTCCCTGCAAGCCTCAGCGACCGAATATATCGGTTATGCGTGG  
GCGATGGTTGTTGTCATTGTTCGGCGCAACTATCGGTATCAAGCTG  
TTAAGAAATTCACCTCGAAAGCAAGCTGATAAACCGATACAAT  
TAAAGGCTCCTTTTGGAGCCTTTTTTTTTGGAGATTTTCAACGTGA  
AAAAATTATTATTCGCAATTCCTTTAGTTGTTCTTTCTATTCTCA  
CTCCGCTGAAACTGTTGAAAGTTGTTTAGCAAAACCCATACAGA  
AAATTCATTTACTAACGTCTGGAAAGACGACAAAACCTTTAGATCG  
TTACGCTAACTATGAGGGTTGTCTGTGGAATGCTACAGGCGTTGT  
AGTTTGTACTGGTGACGAACTCAGTGTTACGGTACATGGGTTC  
TATTGGGCTTGCTATCCCTGAAAATGAGGGTGGTGGCTCTGAGGG  
TGCGGTTCTGAGGGTGGCGTTCTGAGGGTGGCGGTTACTAAC  
CTCCTGAGTACGGTGATACACCTATTCGGGCTATACTTATATCA  
ACCCTCTCGACGGCACTTATCCGCCTGGTACTGAGCAAAACCCCG  
CTAATCCTAATCCTTCTCTTGAGGAGTCTCAGCCTCTAATACTTT

CATGTTTCAGAATAATAGGTTCCGAAATAGGCAGGGGGCATTAA  
CTGTTTATACGGGCACTGTTACTCAAGGCACTGACCCCGTTAAAA  
CTTATTACCAGTACACTCCTGTATCATCAAAGCCATGTATGACG  
CTTACTGGAACGGTAAATTCAGAGACTGCGCTTTCATTCTGGCT  
TTAATGAAGATCCATTCGTTTGTGAATATCAAGGCCAATCGTCTG  
ACCTGCCTCAACCTCCTGTCAATGCTGGCGGGCGGCTCTGGTGGTG  
GTTCTGGTGGCGGCTCTGAGGGTGGTGGCTCTGAGGGTGGCGGT  
CTGAGGGTGGCGGCTCTGAGGGAGGCGGTTCCGGTGGTGGCTCT  
GGTTCGGTGATTTTGATTATGAAAAGATGGCAAACGCTAATAA  
GGGGGCTATGACCGAAAATGCCGATGAAAACGCGCTACAGTCTG  
ACGCTAAAGGCAAACCTTGATTCTGTCTACTGATTACGGTGCTG  
CTATCGATGGTTTCATTGGTGACGTTTCGGCCTTGCTAATGGTA  
ATGGTGCTACTGGTGATTTTGCTGGCTCTAATTCCCAAATGGCTC  
AAGTCGGTGACGGTGATAATCACCTT **TAATGAATAATTCGTC**  
**AATA**TTTACCTTCCCTCCCTCAATCGGTTGAATGTCGCCCTTTTGT  
CTTTAGCGCTGGTAAACCATATGAATTTTCTATTGATTGTGACAA  
AATAAACTTATTCCGTGGTGTCTTTGCGTTTCTTTTATATGTTGCC  
ACCTTTATGTATGTATTTTCTACGTTTGCTAACATACTGCGTAATA  
AGGAGTCTTAATCATGCCAGTTCTTTTGGGTATTCCGTTATTATTG  
CGTTTCCTCGGTTTCCTTCTGGTAACTTTGTTTCGGCTATCTGCTTA  
CTTTTCTTAAAAAGGGCTTCGGTAAAGATAGCTATTGCTATTTTATT  
GTTTCTTGCTCTTATTATTGGGCTTAACTCAATTCTTGTTGGGTTAT  
CTCTCTGATATTAGCGCTCAATTACCCTCTGACTTTGTTTCAGGGTG  
TTCAGTTAATTCTCCCGTCTAATGCGCTTCCCTGTTTTTATGTTAT  
TCTCTCTGTAAAGGCTGCTATTTTCAATTTTGTGACGTTAAACAAA  
AATCGTTTCTTATTTGGATTGGGATAAATAATATGGCTGTTTATTT  
TGTAACCTGGCAAATTAGGCTCTGGAAAGACGCTCGTTAGCGTTGG  
TAAGATTCAGGATAAAAATTGTAGCTGGGTGCAAATAGCAACTA  
ATCTTGATTTAAGGCTTCAAACCTCCCGCAAGTCGGGAGGTTTCG  
CTAAAACGCCTCGCGTTCTTAGAATACCGGATAAGCCTTCTATAT  
CTGATTTGCTTGCTATTGGGCGCGGTAATGATTCCTACGATGAAA  
ATAAAAACGGCTTGCTTGTTCTCGATGAGTGCGGTACTTGGTTTA  
ATACCCGTTCTTGGAATGATAAGGAAAGACAGCCGATTATTGATT  
GGTTTCTACATGCTCGTAAATTAGGATGGGATATTATTTTCTTGT  
TCAGGACTTATCTATTGTTGATAAACAGGCGCGTTCTGCATTAGC  
TGAACATGTTGTTTATTGTCGTCGTCTGGACAGAATTACTTTACCT  
TTTGTGCGTACTTTATATTCTTATTACTGGCTCGAAAATGCCTC  
TGCCTAAATTACATGTTGGCGTTGTTAAATATGGCGATTCTCAAT

TAAGCCCTACTGTTGAGCGTTGGCTTTATACTGGTAAGAATTTGT  
ATAACGCATATGATACTAACAGGCTTTTTCTAGTAATTATGATT  
CCGGTGTTTATTCTTATTTAACGCCTTATTTATCACACGGTCGGTA  
TTCAAACCATTAAATTTAGGTCAGAAGATGAAATTA ACTAAAAT  
ATATTTGAAAAAGTTTTCTCGCGTTCCTTGTCTTGCGATTGGATTT  
GCATCAGCATTACATATAGTTATATAACCCAACCTAAGCCGGAG  
GTTAAAAAGGTAGTCTCTCAGACCTATGATTTTGATAAATTCACT  
ATTGACTCTTCTCAGCGTCTTAATCTAAGCTATCGCTATGTTTCA  
AGGATTCTAAGGGAAAATTAATTAATAGCGACGATTTACAGAAG  
CAAGGTTATTCACTCACATATATTGATTTATGTACTGTTCCATTA  
AAAAAGGTAATTCAAATGAAATTGTTAAATGTAATTAATTTTGTT  
TTCTTGATGTTTGTTTCATCATCTTCTTTTGCTCAGGTAATTGAAA  
TGAATAATTCGCCTCTGCGCGATTTTGTA ACTTGGTATTCAAAGC  
AATCAGGCGAATCCGTTATTGTTTCTCCCGATGTAAAAGGTACTG  
TACTGTATATTCATCTGACGTTAAACCTGAAAATCTACGCAATT  
TCTTTATTTCTGTTTTACGTGCTAATAATTTTGATATGGTTGGTTC  
AATTCCTTCCATAATTCAGAAGTATAATCCAAACAATCAGGATTA  
TATTGATGAATTGCCATCATCTGATAATCAGGAATATGATGATAA  
TTCCGCTCCTTCTGGTGGTTTCTTTGTTCCGCAAATGATAATGTT  
ACTCAA ACTTTTAAAATTAATAACGTTCCGGGCAAAGGATTTAATA  
CGAGTTGTCGAATTGTTTGTAAGTCTAATACTTCTAAATCCTCA  
AATGTATTATCTATTGACGGCTCTAATCTATTAGTTGTTAGTGCAC  
CTAAAGATATTTAGATAACCTTCCCTCAATTCCTTTCTACTGTTGA  
TTTGCCAACTGACCAGATATTGATTGAGGGTTTGATAATTTGAGGT  
TCAGCAAGGTGATGCTTTAGATTTTTCATTTGCTGCTGGCTCTCAG  
CGTGGCACTGTTGCAGGCGGTGTTAATACTGACCGCCTCACCTCT  
GTTTTATCTTCTGCTGGTGGTTCGTTCCGGTATTTTTAATGGCGATG  
TTTTAGGGCTATCAGTTCGCGCATTAAAGACTAATAGCCATTCAA  
AAATATTGTCTGTGCCACGTATTCTTACGCTTTCAGGTCAGAAGG  
GTTCTATCTCTGTTGGCCAGAATGTCCCTTTTATTACTGGTCGTGT  
GACTGGTGAATCTGCCAATGTAAATAATCCATTT CAGACGATTGA  
GCGTCAA AATGTAGGTATTTCCATGAGCGTTTTTCTGTTGCAAT  
GGCTGGCGGTAATATTGTTCTGGATATTACCAGCAAGGCCGATAG  
TTTGAGTTCTTCTACTCAGGCAAGTGATGTTATTACTAATCAAAG  
AAGTATTGCTACAACGGTAAATTTGCGTGATGGACAGACTCTTTT  
ACTCGGTGGCCTCACTGATTATAAAAACACTTCTCAAGATTCTGG  
CGTACCGTTCCTGTCTAAAATCCCTTTAATCGGCCTCCTGTTTAGC  
TCCCGCTCTGATTCCAACGAGGAAAGCACGTTATACGTGCTCGTC

|                         |                                                                                                                                                                                                                                                                                                                                                                                                                                                                                                                                                                                                                                                                                                                                                                                                                                                                                           |
|-------------------------|-------------------------------------------------------------------------------------------------------------------------------------------------------------------------------------------------------------------------------------------------------------------------------------------------------------------------------------------------------------------------------------------------------------------------------------------------------------------------------------------------------------------------------------------------------------------------------------------------------------------------------------------------------------------------------------------------------------------------------------------------------------------------------------------------------------------------------------------------------------------------------------------|
|                         | AAAGCAACCATAGTACGCGCCCTGTAGCGGCGCATTAAAGCGCGG<br>CGGGTGTGGTGGTTACGCGCAGCGTGACCGCTACACTTGCCAGC<br>GCCCTAGCGCCCGCTCCTTTTCGCTTTCTTCCCTTCCTTTCTCGCCA<br>CGTTCGCCGGCTTTCCCCGTCAAGCTCTAAATCGGGGGCTCCCTT<br>TAGGGTTCCGATTTAGTGCTTTACGGCACCTCGACCCCAAAAAC<br>TTGATTTGGGTGATGGTTCACGTAGTGGGCCATCGCCCTGATAGA<br>CGGTTTTTCGCCCTTTGACGTTGGAGTCCACGTTCTTTAATAGTGG<br>ACTCTTGTCCAAACTGGAACAACACTCAACCCTATCTCGGGCTA<br>TTCTTTTGATTTATAAGGGATTTTGCCGATTCGGAACCACCATCA<br>AACAGGATTTTCGCCTGCTGGGGCAAACCAGCGTGGACCGCTTG<br>CTGCAACTCTCTCAGGGCCAGGCGGTGAAGGGCAATCAGCTGTT<br>GCCCGTCTCGCTGGTGAAAAGAAAAACCACCCTGGCGCCCAATA<br>CGCAAACCGCCTCTCCCCGCGCGTTGGCCGATTCATTAATGCAGC<br>TGGCACGACAGGTTTCCCGACTGGAAAGCGGGCAGTGAGCGCAA<br>CGCAATTAATGTGAGTTAGCTCACTCATTAGGCACCCAGGCTTT<br>ACACTTTATGCTTCCGGCTCGTATGTTGTGTGGAATTGTGAGCGG<br>ATAACAATTTCACACAGGAAACAGCTATGACCATGATTACGAAT<br><b>TCGAGCTCGGTACCCGGGGATCC</b> |
| 7 bp-<br>TDN<br>primer  | <b>GCCTACTCAATATCATAACG</b> GAAT <b>GGATCCCCGGGTACCGAGCTCG</b>                                                                                                                                                                                                                                                                                                                                                                                                                                                                                                                                                                                                                                                                                                                                                                                                                            |
| 13 -bp<br>TDN<br>primer | <b>GACCAAGCACAGGCAAGATGTTT</b> <b>TATTGACGGAATTATTCATTA</b>                                                                                                                                                                                                                                                                                                                                                                                                                                                                                                                                                                                                                                                                                                                                                                                                                               |

## (2) Gel electrophoresis characterization of DNA samples:

Our TDN-marked DNA molecules were characterized using gel electrophoresis. Figure S1 shows that the migration speed of TDN-marked M13 linear DNA molecules is similar to the original linear ds-M13 molecules. No significant difference was observed in the persistence length due to the binding of the TDNs, since significant reduction in the persistence length would result in faster migration of DNA molecules in the gel.

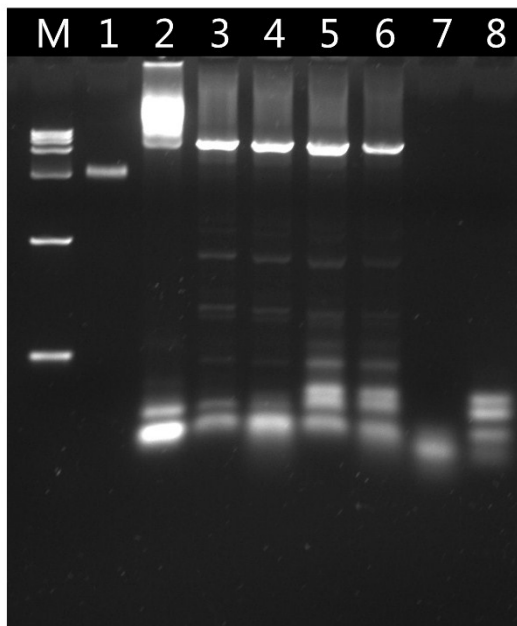

**Figure S1.** Gel electrophoresis characterization of DNA samples: (M) DNA ladder (DL 15000), (1) circular ss-M13, (2) circular ds-M13, (3) linear ds-M13, (4) 7-bp TDN-marked linear ds-M13, (5) 13-bp TDN-marked linear ds-M13, (6) 7-bp and 13-bp TDN-marked linear ds-M13, (7) 7-bp TDN, and (8) 13-bp TDN.



### (3) Single ds-DNA (linear M13 DNA molecule) translocation statistics

Figure S2 presents the scatter plot of the current blockade versus event duration as measured for linear ds-M13, whose sequence is shown in (1). From the fitted value of  $\Delta G = 0.49 \text{ nS}$ , we estimate the effective thickness of the nanopore as  $h = 36.8 \text{ nm}$  by using equation (1) in the main text. This value is then used to calculate the equivalent diameters of different TDNs.

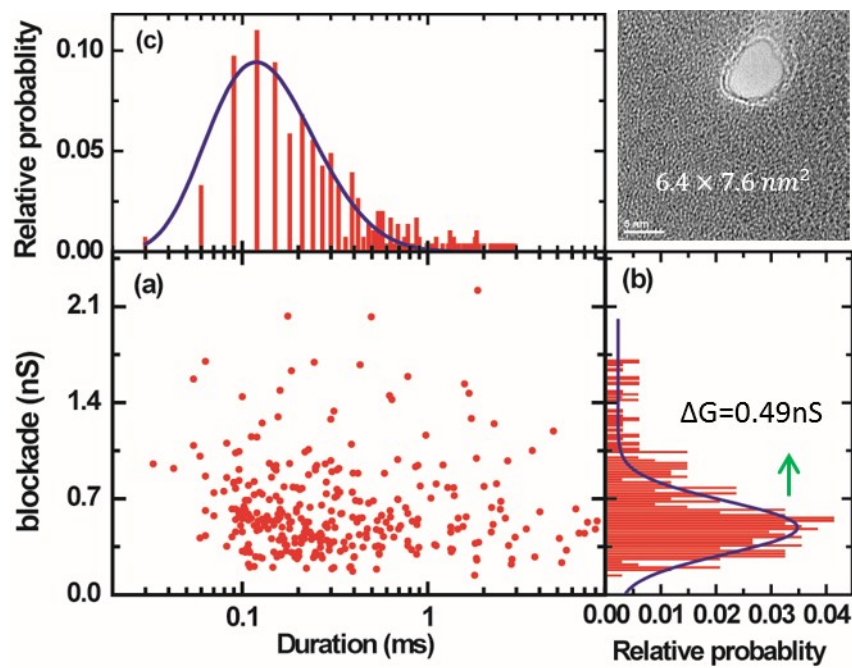

**Figure S2.** Translocation statistics for single linear ds-M13 DNA molecular in our experiment, total of 344 events. Inset is TEM graph of the nanopore used in this experiment.

#### (4) Translocation events of the third configuration

In our experiment, only two translocation events were observed for the third binding configuration with 7-bp and 13-bp TDNs attached at two sites. The detailed current traces for the two events as shown below. This low yield may stem from the poor efficiency in sample preparation.

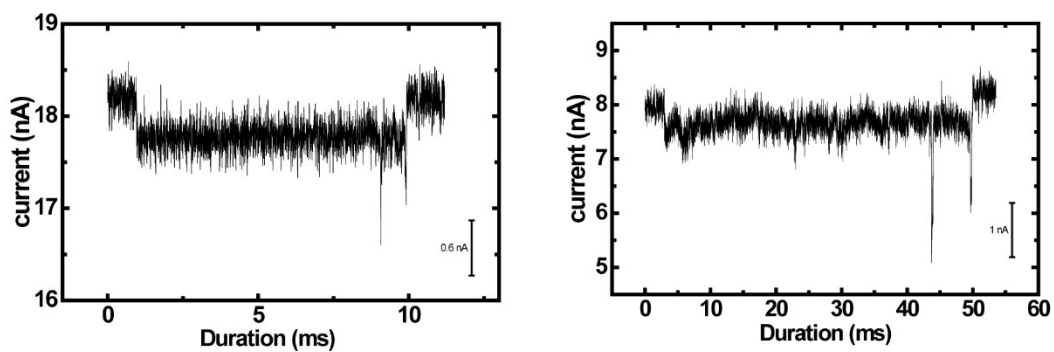

**Figure S3.** Translocation events for the third binding configuration as observed in our experiment.

### (5) AFM characterization of TDNs-marked DNA molecules

TDNs attached to the linear M13 molecules are too small to be seen by the AFM. We attached biotin-streptavidin (STV) complex to the TDNs so that the existence and the position of TDNs can be inferred from the AFM images. The size of the biotin-STV is about 2 nm and it appears as a bright protrusion, as shown in the figures below.

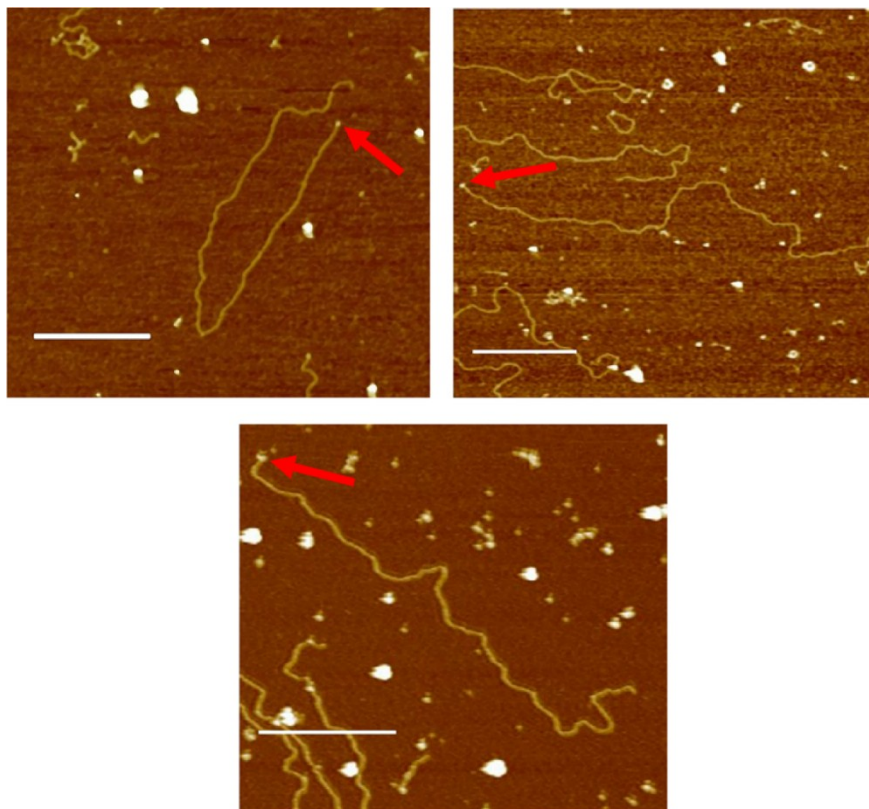

**Fig S4.** Typical AFM images of the TDN-marked M13 molecules for the first binding configuration. The positions of 7-bp TDNs are marked by the red arrows. Scale bars: 500 nm.

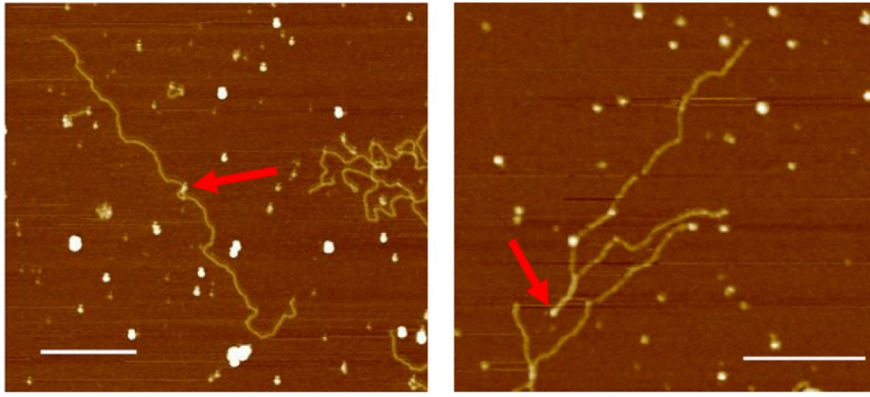

**Fig S5.** Typical AFM images of the TDN-marked M13 molecules for the second binding configuration. The positions of 13-bp TDNs are marked by the red arrows. Scale bars: 500 nm.

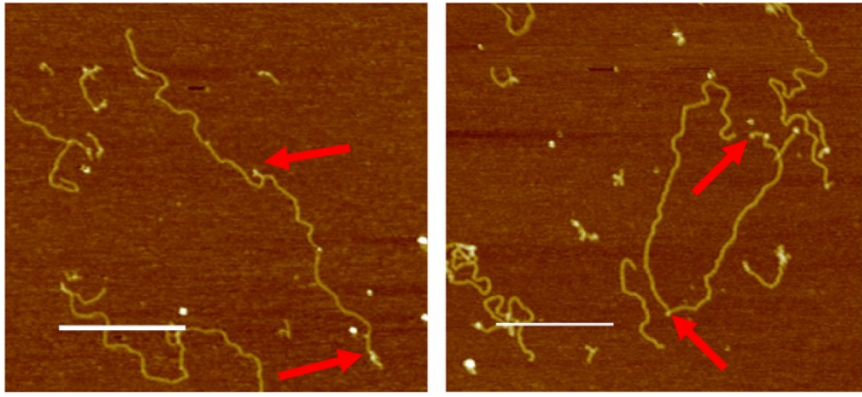

**Fig S6.** Typical AFM images of the TDN-marked M13 molecules for the third configuration. The positions of 7-bp and 13-bp TDNs are marked by the red arrows. Scale bars: 500 nm.
